# Supplementary material
Source: MDPI journal article supplement (https://www.mdpi.com/2624-862X/2/1/11)
Supplement: s1 [file s1]

Supplementary information

**LCQTOF/MS Untargeted Metabolomics of Sheep Milk under Cocoa Husks  
Enriched Diet**

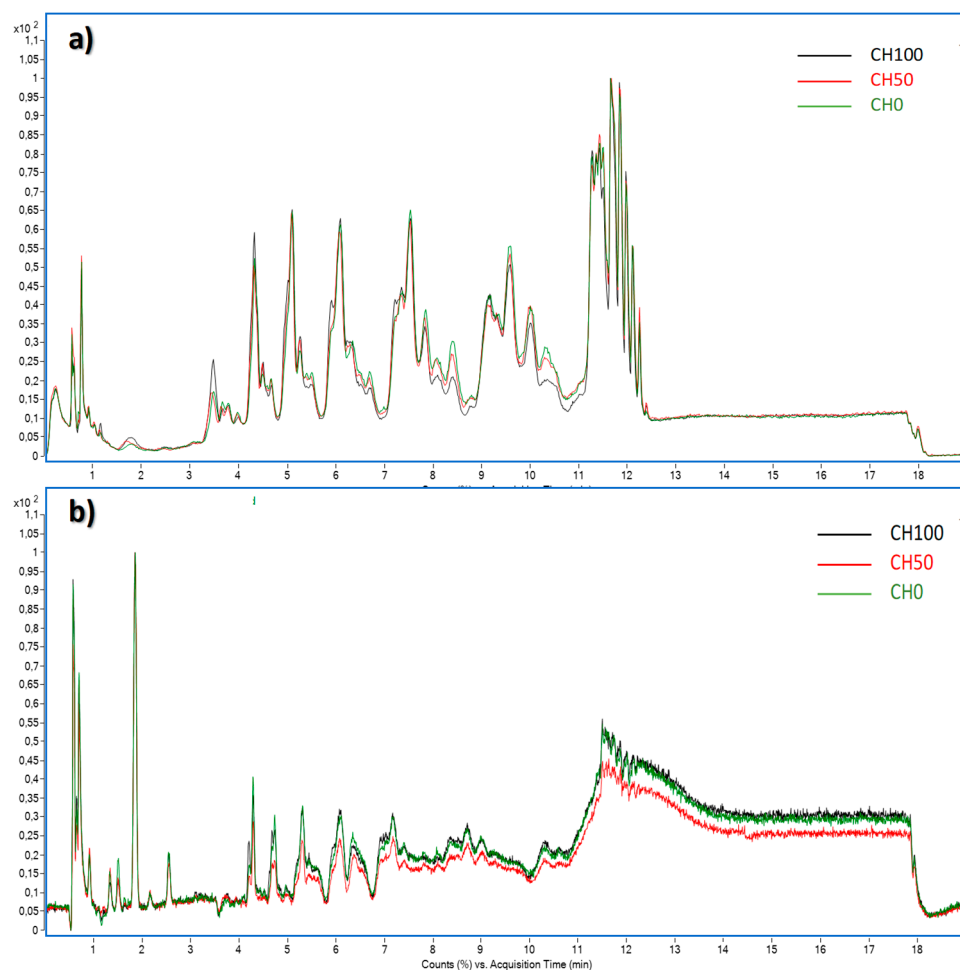

**Figure S1.** Milk sample overlaid chromatograms of CH0, CH50 and CH100 groups acquired in positive (a) and negative (b) ionization mode.

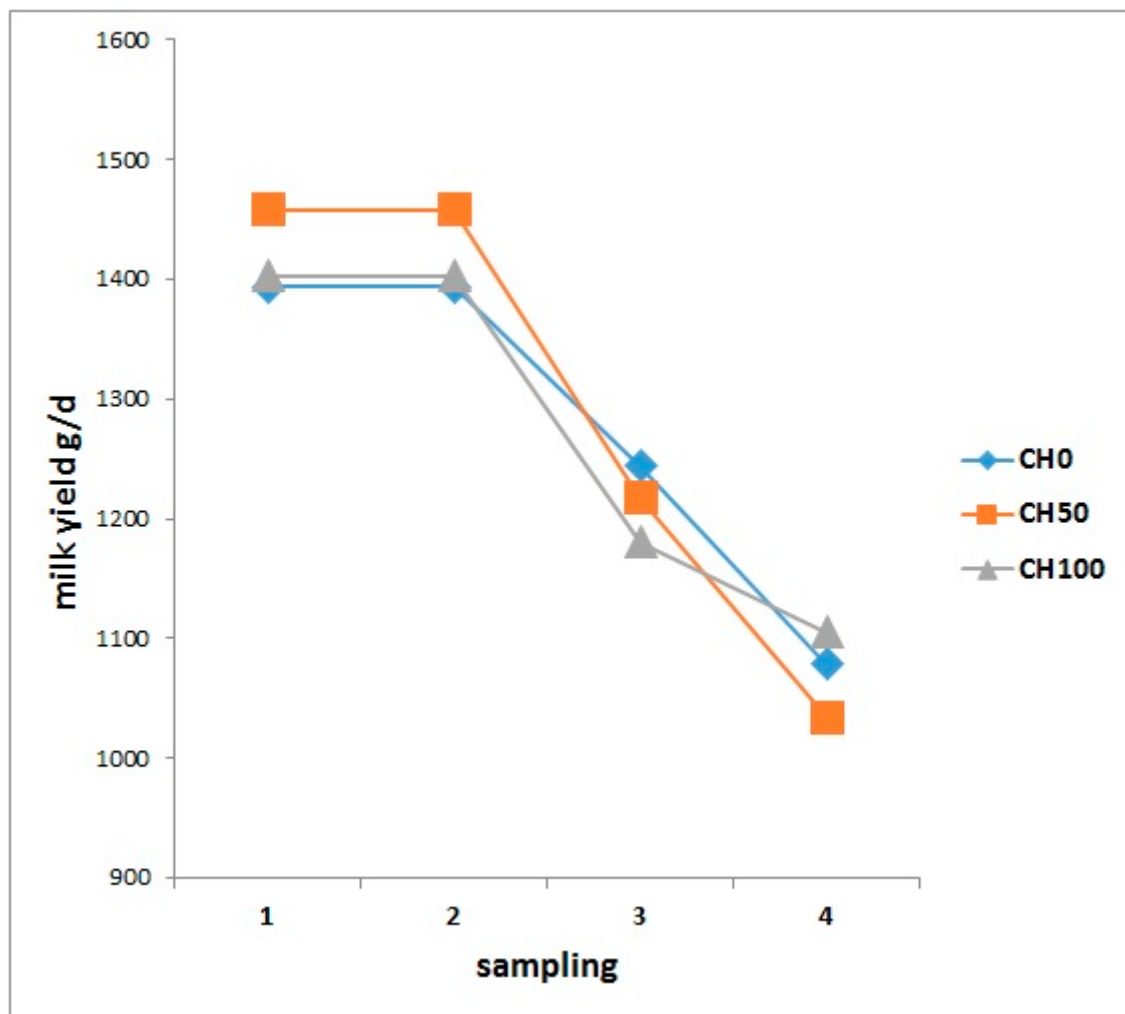

**Figure S2.** Temporal evolution of milk yield in the control (CH0) and in the two cocoa husks supplemented groups (CH50 and CH100).

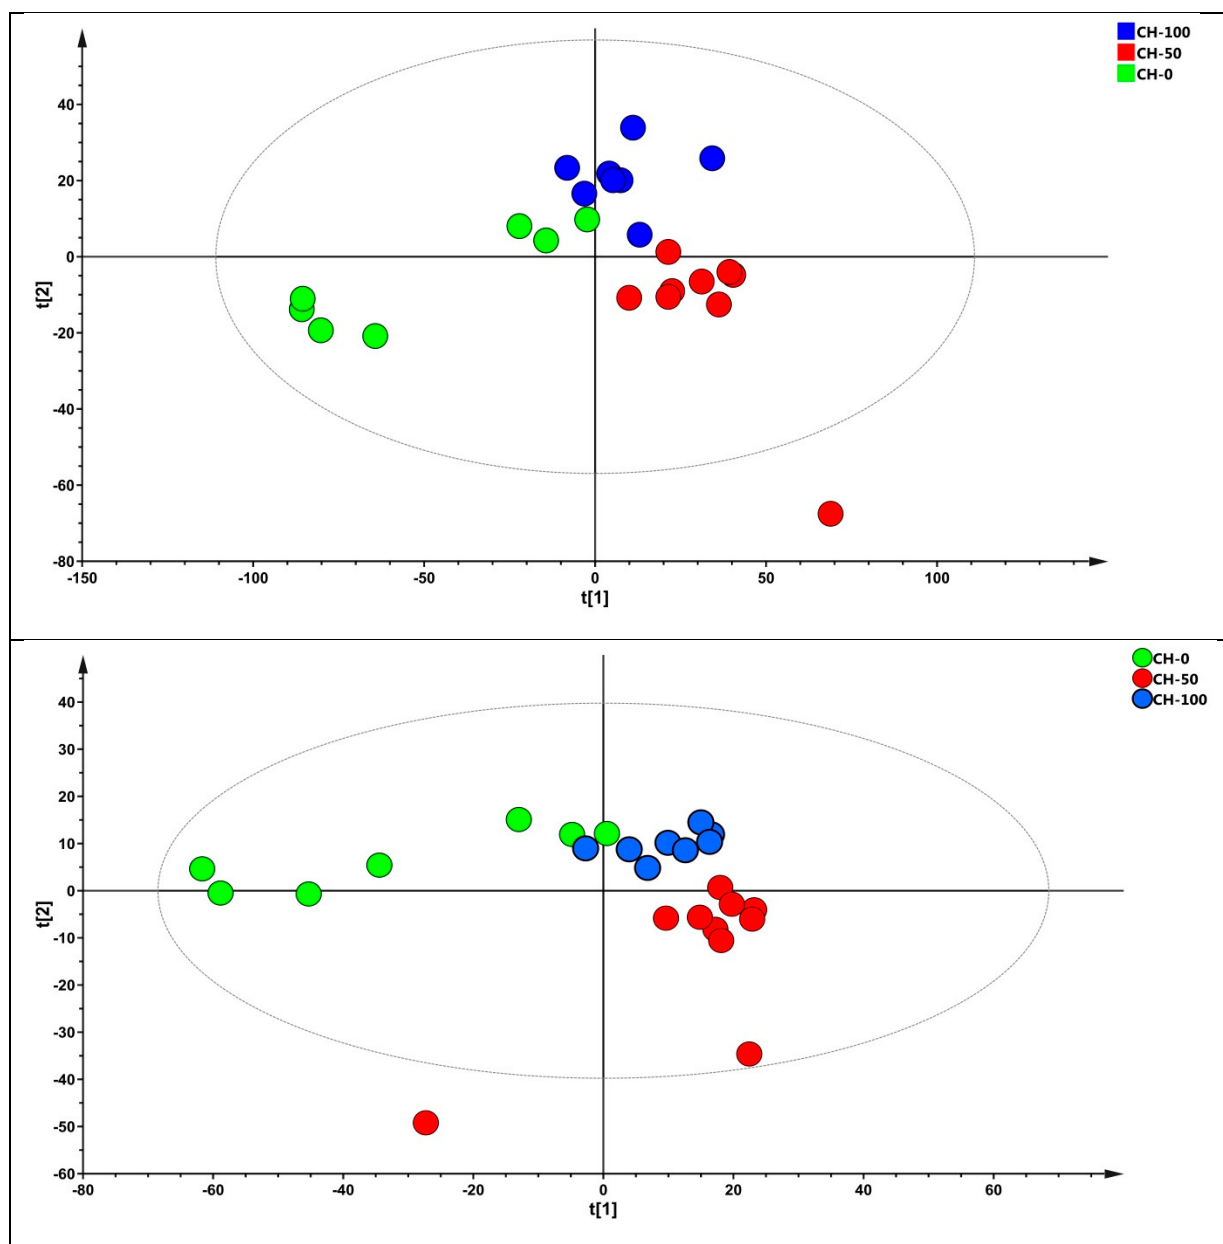

**Figure S3.** Partial least square discriminant analysis (PLS-DA) score plots of milk samples of the experimental groups (CH0, CH50 and CH100) collected in the last week of treatment. LCMS data collected in the positive (top,  $R^2Y = 0.62$ ,  $Q^2Y = 0.27$ ) and negative (bottom,  $R^2Y = 0.98$ ,  $Q^2Y = 0.63$ ) ionization mode.

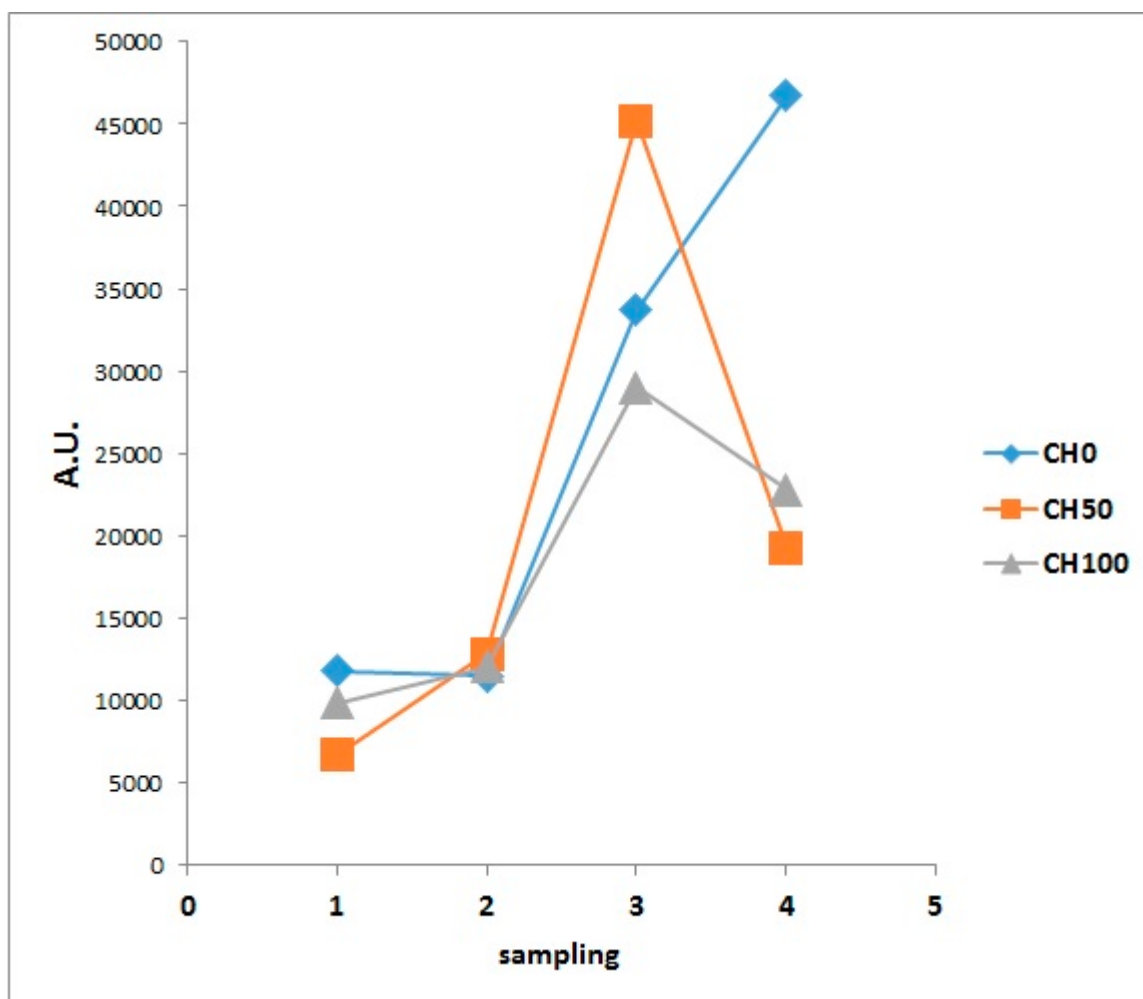

**Figure S4.** Temporal evolution of thyroxine (T4) milk levels in the control (CH0) and in the two cocoa husks supplemented groups (CH50 and CH100).
